# Supplementary material
Source: PubMed Central journal article supplement (PMC4311810)
Supplement: pnas.201416065SI.pdf [file pnas.201416065SI.pdf]

# Supporting Information

Rincón-Cortés et al. 10.1073/pnas.1416065112

## SI Materials and Methods

**Subjects.** Long-Evans rats were born and bred in our colony, housed in polypropylene cages (34 × 29 × 17 cm) with an abundant amount of wood shavings for nest building, and kept in a 20 ± 1 °C environment with a 12:12 light-dark cycle. Food and water were available ad libitum. The day of birth was considered postnatal day (PN) 0, and litters were culled to 12 pups on PN1. Both males and females were used during infancy, but only males were used in adulthood. All animal care and experimental procedures were approved by the Institutional Animal Care and Use Committees, which follow the guidelines from the National Institutes of Health.

### Infant Procedures.

**Infant odor-shock conditioning.** Odor-shock conditioning began during the sensitive period (PN8) and continued past the end of the sensitive period (PN10) into the transitional sensitive period, which is characterized by maternal presence reinstating sensitive-period learning (1). Our laboratory has previously shown that, provided odor-shock conditioning is initiated during the sensitive period (before PN10) and ends before the termination of the transitional sensitive period (PN15), odor-shock conditioning continues to support the unique sensitive-period odor-preference learning (2, 3).

At PN8, pups were placed in individual 600-mL beakers and given a 10-min acclimation period before conditioning to allow for recovery from experimental handling. During a conditioning session, pups received 9–11 pairings of a 30-s peppermint odor with 0.5 mA hindlimb shock during the last 1 s of odor, with an intertrial interval (ITI) of 4 min. The odor (peppermint; McCormick & Co. Inc.) was delivered by a flow dilution olfactometer (2 L/min flow rate) at a concentration of 1:10 peppermint vapor. The control group did not receive shock. Pups were returned to the home cage immediately after conditioning.

**Maternal behavior assessment.** Maternal behaviors were recorded daily (30-min session divided into 6 × 5-min segments) from PN8 to PN12 to ensure that the adult effects observed in paired odor-shock animals were not due to atypical maternal care. Behavioral values are expressed as percentage of observation periods in which behaviors occur for each of the observation periods. Percentages of behavioral measures do not add to 100% because behaviors can cooccur or not.

### Verification of Infant Maternal Odor (i.e., Preference) Learning.

**Behavioral activation.** To verify associative learning during the training session, pups' behavioral responses to conditioned stimulus (CS) odor presentation during the 20 s before the shock were recorded and used to construct acquisition curves in which each data point represents the summation of behavior from two consecutive trials (4, 5). Due to motor immaturity, an age-appropriate behavioral rating scale (0–5) in which 0 indicates no movement and 5 indicates movement of all limbs and head was used to evaluate learning.

**Y-maze.** To ensure that odor-shock conditioning resulted in an odor preference, pups were given a 5-trial Y-maze test after odor-shock conditioning (2, 6). The Plexiglas Y-maze consisted of a start box (8.5 × 10 × 8 cm) and two choice arms (8.5 × 24 × 8 cm): one containing 20 µL of peppermint (on a Kim Wipe in a Petri dish) and the other one containing a neutral but familiar odor (i.e., 20 mL of clean bedding in a Petri dish). Pups were placed in the start box in a counterbalanced direction for each trial, and the doors to each arm were opened after 5 s. Approach

responses to the peppermint odor paired with shock or the neutral odor (i.e., clean bedding) were measured in 5 × 60-s trials. A response was considered a choice when a pup's head and two front paws moved beyond the entrance to the alley. Trials were separated by a 5-s interval, and the floor was wiped clean in between each trial.

**Nipple attachment.** To verify that the odor paired with shock acquired properties of the maternal odor, pups were tested using a nipple attachment test with an anesthetized mother (urethane, 1.5 g/kg, i.p., prevents milk letdown) after conditioning (2). Because the maternal odor is required for pups' nipple attachment (7), the natural maternal odor was removed through chemical wash of the mother's ventrum—5-min wash of acetone, 5-min wash of alcohol, 5-min wash with water, and drying (8, 9). The washed mother was then placed in the testing chamber (25 × 40 × 20 cm) on her side to provide pup access to nipples. An individual pup was placed in the testing apparatus, perpendicular to the mother's ventrum, and the learned (peppermint) odor was presented in an air stream 2 cm above the center of the mother's ventrum (2 L/min, 1:10 maternal odor:air). The time pups spent attached to the nipple was recorded during a 3-min test.

**Infant Microdialysis/HPLC.** Two days before the PN12 conditioning session, pups were anesthetized by isoflurane inhalation and placed in a stereotaxic apparatus, and a microdialysis guide cannula (EICOM Corp.; 8 mm long, 500 µm diameter acrylic resin) was implanted unilaterally in the BLA through holes drilled in the overlying skull. Stereotaxic coordinates derived from the Paxinos atlas (10) were adapted through pilot work for implanting cannulae into the infant amygdala (BLA: caudal –0.90 mm from bregma; lateral ±4.50 mm from lambda; lowered 0.6 mm from the surface of the skull) (5). After recovery from surgery (generally within 30 min), pups were returned to the litter and dam. On the day of the experiment (PN12), pups were placed in a 27-cm-diameter acrylic circular cage (EICOM Corp.) that allowed them to move freely, the microdialysis probes (EICOM Corp.; A-I-8-02, 8 mm length, 2 mm membrane, 220 µm diameter) were inserted into the guide cannula, and the probes were perfused with artificial cerebrospinal fluid (ACSF; 147 mM NaCl, 2.7 mM KCl, 1.2 mM CaCl<sub>2</sub>, 0.85 mM MgCl<sub>2</sub>) at a flow rate of 1.5 µL/min. Dialysate was collected automatically every 10 min in a refrigerated (4 °C) microfraction collector (EFC-82; EICOM Corp.) in vials containing 2 µL of 12.5 mM perchloric acid/250 µM EDTA during a 2-h baseline period, a 45-min conditioning session, and a recovery period of at least 1 h. After completion of the experiment, dialysate samples were immediately stored at –80 °C until analyzed for 5-HT using an EICOM ECD-300 HPLC with electrochemical detection (5, 11). Sample aliquots (10 µL) were injected, and separation was achieved using a reverse-phase octadecylsilane (ODS) column (Eicompak SC-50DS, 2.1 mm i.d. × 150 mm, 5 µm particle; EICOM) with the potential of the graphite electrode set to +750 mV against the Ag/AgCl reference electrode. The column temperature was maintained at 25 °C. The mobile phase consisted of 100 mM citric acid, 0.25 mM octyl sulfate sodium salt, 0.5 mM EDTA, 0.085 mM triethylamine, and 6% (vol/vol) acetonitrile, adjusted to pH 2.4, and the flow rate was set at 0.23 mL/min.

**Infant FLX Administration.** No pups were away from the nest beyond that required for cage cleaning and administering injections, which were conducted typically within 5 min, and pups were returned to the mother. Injections occurred from PN12 to –22,

and maternal behaviors were recorded daily (30-min sessions, 6 × 5-min sessions). Behavioral values are expressed as percentage of observation periods in which behaviors occur for each of the observation periods. Percentages of behavioral measures do not add to 100% because behaviors can cooccur or not.

#### Adult Behavioral Assays.

**Social behavior test.** Social behavior was tested in a two-chamber apparatus (60 w × 60 l × 70 h cm) built out of black Plexiglas sheets for the sides and white bottom to form an open-top box. A black Plexiglas division (60 × 60 cm) separated the two chambers and a (15 × 13 cm) square opening allowed animals to move between chambers. Two metal chambers (6 × 6 × 6 cm) with circular holes (1 cm) placed 1 cm apart in each of the four sides and a metal grid with 0.5-cm openings 0.5 cm apart on the top were placed in each chamber during an acclimation period of 5 min. After acclimation, a younger (PN30 to 50) same-sex animal was placed inside one of the metal cubes, and time spent in each chamber, as well as number of chamber crossings, was recorded for 10 min. For odor presentation, two olfactometer output tubes per chamber were placed on the interior of the chamber walls during testing.

**Forced swim test (FST).** Depressive-like behavior was tested in a cylinder that was filled with water (25 ± 1 °C and changed for each test) to achieve a depth that prevented both escape and the tail from touching the bottom (2, 12, 13). Animals were habituated for 15 min one day before testing (day 1), and tested for a duration of 5 min on the next day (day 2). The time the animal spent immobile, defined as passive floating without struggling, in a slightly hunched but upright position with the head slightly immersed and minor movements necessary to maintain the head above water, was recorded (14, 15). For odor presentation during the FST, a Plexiglas lid containing an odor tube covered the FST apparatus to ensure the odor did not dissipate similar to ref. 3. No animal was tested more than once in the FST, and these animals were used for gene-expression assessment. Additional animals were generated to assess social behavior, in which case this testing was conducted 1 wk before the FST. No animals received odor presentations more than once (either social behavior or FST—not both).

**RIA.** Thirty minutes after the end of the adult FST, trunk-blood samples were collected in 1.5-mL Eppendorf tubes and centrifuged at 3,000 rpm (Fisher Scientific accuSpin model Micro17R Microcentrifuge) at 4 °C for 15 min to separate the red blood cells from the plasma. Aliquoted plasma samples were stored at –80 °C until RIA analysis. The samples were analyzed using the Rat Corticosterone Coat-A-Count Kit (Siemens) and a gamma counter.

#### Gene-Expression Analysis.

**Amygdala dissection.** The brain was cut in two hemispheres. Dissection included bilateral localization of the amygdala using the ventral hippocampus and putamen landmarks for the rostral and caudal cuts. The brain was turned to obtain a coronal view, where the rhinal fissure could be easily seen and used as a landmark to make the dorsal cut. The medial cut included a 45° cut from the optic chiasm and the removal of the lateral overlying cortical tissue. Enriched amygdala tissue was removed, frozen, and stored at –80 °C until further use.

**Microarray.** Frozen harvested amygdala sections ( $n = 8$  per group) were processed for total RNA (Qiagen RNeasy Micro Kit). RNA was extracted using elution columns; residual buffers and enzymes were removed. mRNA was amplified linearly, and hybridized to Affymetrix rat 2.0 chips, as specified by Affymetrix and NuGEN (Pico system). To reduce the influence of technical variability, samples for each condition were always prepared and hybridized at the same time. Two separate comparisons were conducted. To assess gene changes in the depressive phenotype,

infant odor-shock paired animals and infant nonshocked animals that were tested in the adult FST without the odor were compared. To assess the effects of the odor, which rescued the depressive phenotype, we compared infant odor-shock paired groups, tested in the FST with and without the infant odor. We refer to this condition as the rescue phenotype.

**Adult Surgery and Intraamygdala Drug Infusion.** Adult male rats were anesthetized by isoflurane inhalation and placed in a stereotaxic apparatus. Stereotaxic coordinates, derived from the Paxinos atlas (16) and adapted through pilot work, were used for implanting bilateral cannulae (23-gauge tubing) into the amygdala (caudal, 2.3 mm; lateral, 5.4 mm from bregma; lowered 8.5), which were fixed to the skull with screws and dental cement. After recovery from surgery (generally within 30 min), rats were returned to the home cage for a 7-d recovery period until testing.

On the test day, the rats' bilateral cannulae were attached via PE50 tubing to a Harvard PHD 2000 syringe pump driving two Hamilton microliter (μL) syringes. The cannulae were filled with serotonin hydrochloride (1 mg/62.5 μL; Sigma), serotonin receptor antagonist methysergide maleate salt (2.5 μg/0.5 μL; Sigma), or physiological saline (0.9%). Rats were infused at 0.1 μL/min for 5 min for an infusion volume of 0.5 μL per hemisphere and a total infusion volume of 1 μL. After infusion, 1 min was allowed for diffusion before removing the PE50 tubing. The FST started 15 min after the infusion. To determine whether a 5-HT/CORT interaction (i.e., low 5-HT, high CORT) contributes to the expression of depressive-like behavior in the FST after infant paired odor shock, some animals received systemic metyrapone (i.p.; 50 mg/kg), a corticosterone synthesis inhibitor (Tocris), ~30 min before the FST (Fig. 4). After testing, brains were removed, frozen, sectioned (20 μm) in a –20 °C cryostat, and stained with cresyl violet for identification of the cannula placement in relation to the amygdala using an atlas (16). The identification was done blind to the experimental groups.

**Adult in Vivo Amygdala Electrophysiology.** Animals were anesthetized with Equithesin (mixture of chloral hydrate and sodium pentobarbital; 3 mL/kg, i.p.) and placed in a stereotaxic apparatus. A bipolar stimulating electrode was lowered in the left olfactory bulb. Three monopolar recording electrodes were implanted ipsilaterally in the olfactory cortex [anteroposterior (A/P) –1.8 mm, lateromedial (L/M) 5.5 mm to Bregma], basolateral amygdala (A/P –2.8 mm, L/M 5.1 mm relative to Bregma) and cortical nucleus of the amygdala (A/P –2.3 mm, L/M 3.3 mm relative to Bregma). Accurate positioning of recording electrodes tips was achieved using the field potential profile evoked in response to electrical stimulation of the olfactory bulb (17). Electrical stimulation was delivered through a Master-8 stimulator (AMPI). The electrical stimulus was a single monophasic square pulse, 0.1 ms duration, 0.2 Hz frequency, 300–500 μA intensity.

The amplitude of the signal collected in the three recording sites in response to single-pulse stimulation of the olfactory bulb was measured. Paired-pulse (using 30 ms interpulse interval) stimulation of the olfactory bulb was used to assess the level of amygdala inhibitory interneuron activity (18, 19). The effect of the conditioning (first) pulse was assessed by measuring changes in the response to the test (second) pulse. A percentage below 100 is observed when the response to the test pulse is smaller than the response to the conditioning pulse and characterizes paired-pulse inhibition whereas a percentage above 100 characterizes paired-pulse facilitation. Evoked field potentials were recorded in the presence and absence of the infant odor previously paired with shock (20 μL of peppermint odor placed on a KimWipe in a syringe and delivered in front of the animal's nose during the recording sessions).

## Statistical Analysis.

**Behavior.** Infant behavioral data and adolescent FST data after infant FLX treatment were analyzed by *t* tests, and differences were considered significant when  $P < 0.05$ . Infant microdialysis data were analyzed by one-way ANOVA. Adult social behavior and FST data were analyzed by two-way ANOVA (infant condition, infant trauma odor as factors) (Fig. 3 A–D). Intraamygdala manipulations in the presence of odor data were analyzed by two-way ANOVA (infant-trauma odor, drug as factors) (Fig. 5A). Intraamygdala manipulations in paired animals (no odor) were analyzed by one-way ANOVA (Fig. 5B). All ANOVA analyses were followed by post hoc Fisher tests.

**Microarray.** We used BrainArray custom chip definition files (CDFs) (University of Michigan; [brainarray.mbni.med.umich.edu/Brainarray/Database/CustomCDF/CDF\\_download.asp](http://brainarray.mbni.med.umich.edu/Brainarray/Database/CustomCDF/CDF_download.asp)) to preprocess and define genes from the Affymetrix perfect match probes (20). We determined differential expression between the two “depressive” phenotype groups (odor-shock paired vs. non-shocked) and the “rescue” phenotype (FST with and without odor) by Ranked Products (21). Correction for multiple testing was with the minimum pfp statistic [percentage of false predictions (pfp)]. From these Ranked Product results, we determined the percentage of differentially regulated genes that fit into different biological processes, molecular function, and cellular component GO categories [protein analysis through evolutionary relationships (PANTHER)] (22). We input all probes with a pfp  $< 0.10$ . We initially input up- and down-regulated probes separately because, in other studies, the gene ontology (GO) categories differed by direction of regulation (23). However, here they did not, and we discuss them together.

Consistent changes in gene expression associated with specific pathways, even if small, are likely more important than changes in individual genes. Thus, we used methods to determine functional

classifications. We were interested in functional pathways that were altered by the early learning, and we selected all probes with a pfp  $< 0.10$  and entered them in DAVID for Gene Ontology using the functional classification algorithm to cluster probes based on gene-to-gene similarities (24, 25). Up- and down-regulated genes were analyzed together given that there were no differences in GO categories in the Panther analysis. We visualized those gene ontology results by directed acyclic graph (DAG) diagrams using the “Gene Ontology enrichment analysis and visualization” tool (GORilla) (26, 27).

To determine pathways involved in the depressive and rescue phenotypes, we used Ingenuity Pathways Analysis (IPA; Ingenuity Systems, [www.ingenuity.com](http://www.ingenuity.com)) to define networks from the top 100 up-regulated and top 100 down-regulated probes ordered by fold change. We included up- and down-regulated genes together because the analytic methods in IPA generate pathways from both. We used the “direct connection” to mapped probes to their corresponding objects in Ingenuity’s Knowledge Base. The IPA Functional Analysis identifies the biological functions most significant to the dataset. Predefined canonical pathways were identified from the Ingenuity Pathways Analysis library. The significance of the association between the dataset and the canonical pathway was measured by Fisher’s exact test for the probability that the association between the genes in the dataset and the canonical pathway was not by chance (Ingenuity Systems, 2009, [www.ingenuity.com](http://www.ingenuity.com)). For descriptive purposes and for clarity of presentation, we show canonical paths typical of those paths.

**Electrophysiology.** Electrophysiological data (signal amplitude and paired-pulse ratios) were analyzed using repeated measures two-way ANOVA (infant condition and infant-trauma odor as factors) followed by post hoc Fisher tests (Fig. 3 E and F and Fig. S2).

- Rincón-Cortés M, Sullivan RM (2014) Early life trauma and attachment: Immediate and enduring effects on neurobehavioral and stress axis development. *Front Endocrinol (Lausanne)* 5:33.
- Sevelinges Y, et al. (2011) Adult depression-like behavior, amygdala and olfactory cortex functions are restored by odor previously paired with shock during infant’s sensitive period attachment learning. *Dev Cogn Neurosci* 1(1):77–87.
- Raineki C, et al. (2014) Paradoxical neurobehavioral rescue by memories of early-life abuse: The safety signal value of odors learned during abusive attachment. *Neuropsychopharmacology*, 10.1038/npp.2014.266.
- Roth TL, Sullivan RM (2006) Examining the role of endogenous opioids in learned odor-stroke associations in infant rats. *Dev Psychobiol* 48(1):71–78.
- Barr GA, et al. (2009) Transitions in infant learning are modulated by dopamine in the amygdala. *Nat Neurosci* 12(11):1367–1369.
- Raineki C, Moriceau S, Sullivan RM (2010) Developing a neurobehavioral animal model of infant attachment to an abusive caregiver. *Biol Psychiatry* 67(12):1137–1145.
- Porter RH, Winberg J (1999) Unique salience of maternal breast odors for newborn infants. *Neurosci Biobehav Rev* 23(3):439–449.
- Hofer MA, Shair H, Singh P (1976) Evidence that maternal ventral skin substances promote suckling in infant rats. *Physiol Behav* 17(1):131–136.
- Teicher MH, Blass EM (1977) First suckling response of the newborn albino rat: The roles of olfaction and amniotic fluid. *Science* 198(4317):635–636.
- Paxinos G, Tork I, Tecott LH, Valentino KL (1991) *Atlas of the Developing Rat Brain* (Academic, New York).
- Shionoya K, Moriceau S, Bradstock P, Sullivan RM (2007) Maternal attenuation of hypothalamic paraventricular nucleus norepinephrine switches avoidance learning to preference learning in preweanling rat pups. *Horm Behav* 52(3):391–400.
- Cryan JF, Valentino RJ, Lucki I (2005) Assessing substrates underlying the behavioral effects of antidepressants using the modified rat forced swimming test. *Neurosci Biobehav Rev* 29(4-5):547–569.
- Raineki C, Cortés MR, Belnoue L, Sullivan RM (2012) Effects of early-life abuse differ across development: Infant social behavior deficits are followed by adolescent depressive-like behaviors mediated by the amygdala. *J Neurosci* 32(22):7758–7765.
- Porsolt RD, Le Pichon M, Jalfre M (1977) Depression: A new animal model sensitive to antidepressant treatments. *Nature* 266(5604):730–732.
- Castagné V, Moser P, Roux S, Porsolt RD (2011) Rodent models of depression: Forced swim and tail suspension behavioral despair tests in rats and mice. *Curr Protoc Neurosci* 55(8.10A):8.10A.1–8.10A.14.
- Paxinos G, Watson C (1997) *The Rat Brain in Stereotaxic Coordinates* (Academic, New York).
- Mouly AM, Di Scala G (2006) Entorhinal cortex stimulation modulates amygdala and piriform cortex responses to olfactory bulb inputs in the rat. *Neuroscience* 137(4):1131–1141.
- Sah P, Faber ES, Lopez De Armentia M, Power J (2003) The amygdaloid complex: Anatomy and physiology. *Physiol Rev* 83(3):803–834.
- Muller JF, Mascagni F, McDonald AJ (2006) Pyramidal cells of the rat basolateral amygdala: Synaptology and innervation by parvalbumin-immunoreactive interneurons. *J Comp Neurol* 494(4):635–650.
- Sandberg R, Larsson O (2007) Improved precision and accuracy for microarrays using updated probe set definitions. *BMC Bioinformatics* 8:48.
- Breitling R, Armengaud P, Amtmann A, Herzyk P (2004) Rank products: A simple, yet powerful, new method to detect differentially regulated genes in replicated microarray experiments. *FEBS Lett* 573(1-3):83–92.
- Mi H, Muruganujan A, Casagrande JT, Thomas PD (2013) Large-scale gene function analysis with the PANTHER classification system. *Nat Protoc* 8(8):1551–1566.
- Sarro EC, Sullivan RM, Barr G (2014) Unpredictable neonatal stress enhances adult anxiety and alters amygdala gene expression related to serotonin and GABA. *Neuroscience* 258:147–161.
- Huang W, Sherman BT, Lempicki RA (2009) Bioinformatics enrichment tools: Paths toward the comprehensive functional analysis of large gene lists. *Nucleic Acids Res* 37(1):1–13.
- Huang W, Sherman BT, Lempicki RA (2009) Systematic and integrative analysis of large gene lists using DAVID bioinformatics resources. *Nat Protoc* 4(1):44–57.
- Eden E, Lipson D, Yogev S, Yakhini Z (2007) Discovering motifs in ranked lists of DNA sequences. *PLoS Comput Biol* 3(3):e39.
- Eden E, Navon R, Steinfeld I, Lipson D, Yakhini Z (2009) GORilla: A tool for discovery and visualization of enriched GO terms in ranked gene lists. *BMC Bioinformatics* 10:48.

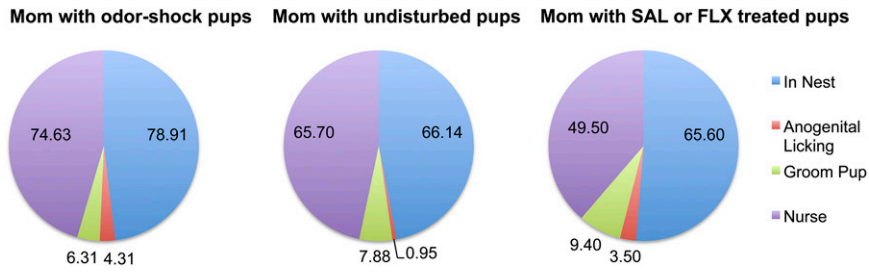

**Fig. S1.** Maternal behaviors of dams whose pups underwent conditioning during infancy, dams with control pups, or dams whose pups were treated with SAL/FLX (half litter SAL; half litter FLX).

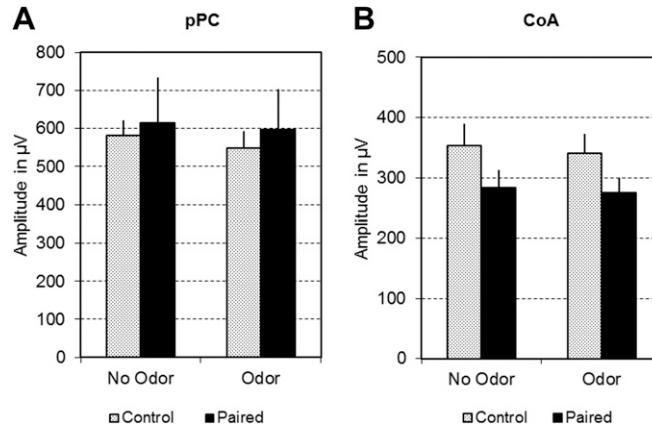

**Fig. S2.** Infant trauma animals did not differ from control animals in the amplitude of the signal induced in the olfactory posterior piriform cortex ( $n = 6-7$ ,  $P = 0.753$ ) (A) or the cortical nucleus of the amygdala ( $n = 6-7$ ,  $P = 0.147$ ) (B) in response to electrical stimulation of the olfactory bulb. No odor effect was found.

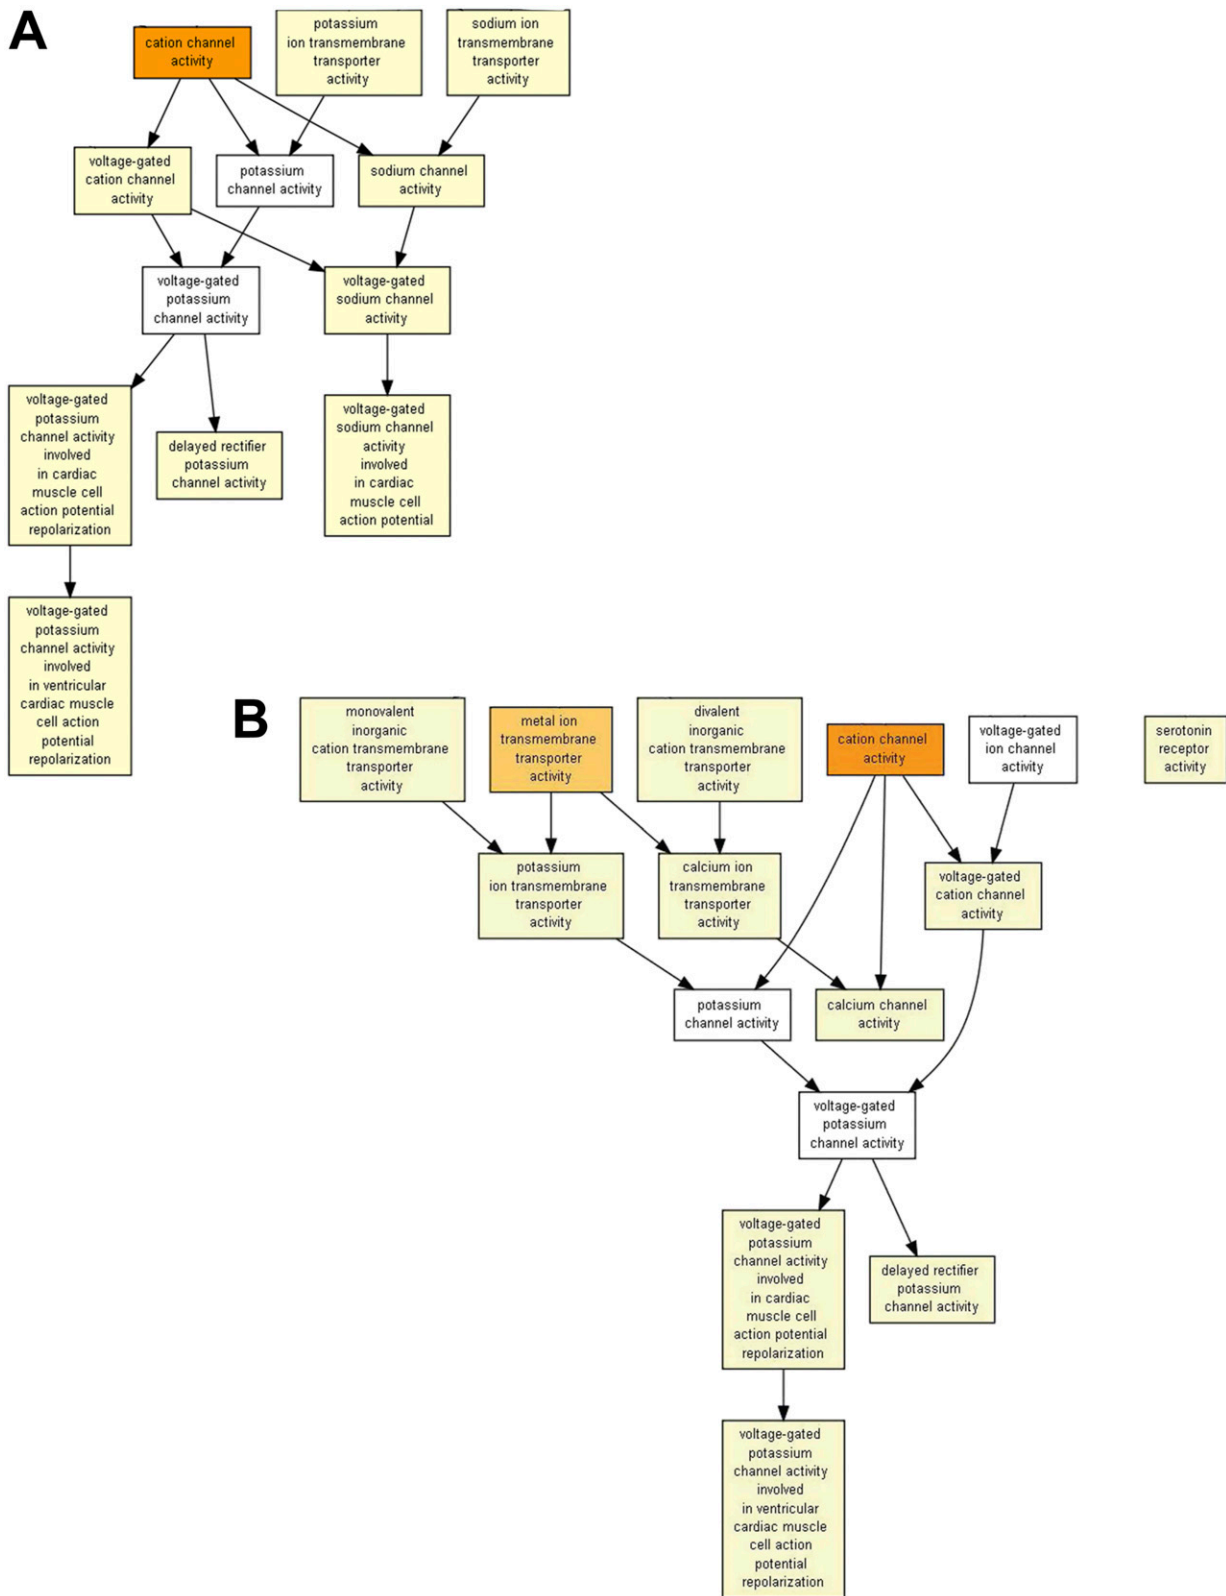

**Fig. S3.** Directed acyclic graph (DAG) diagrams of the molecular function gene ontology and IPA Networks. The input to DAVID were all probes with the  $pfp < 0.10$  (from Tables S1 and S2) using the medium stringency option. Note that only probe names are given, not the magnitude or direction of change. For the depressive phenotype (A), there were three gene groups that were largely solute carriers for cations, and sodium and potassium channels. The rescue phenotype (B) also shows changes in potassium channel activity, but altered 5-HT binding as well. Note that the full DAG was cropped for clarity and "parent" GO terms are not shown (e.g., 5-HT receptor activity; B).

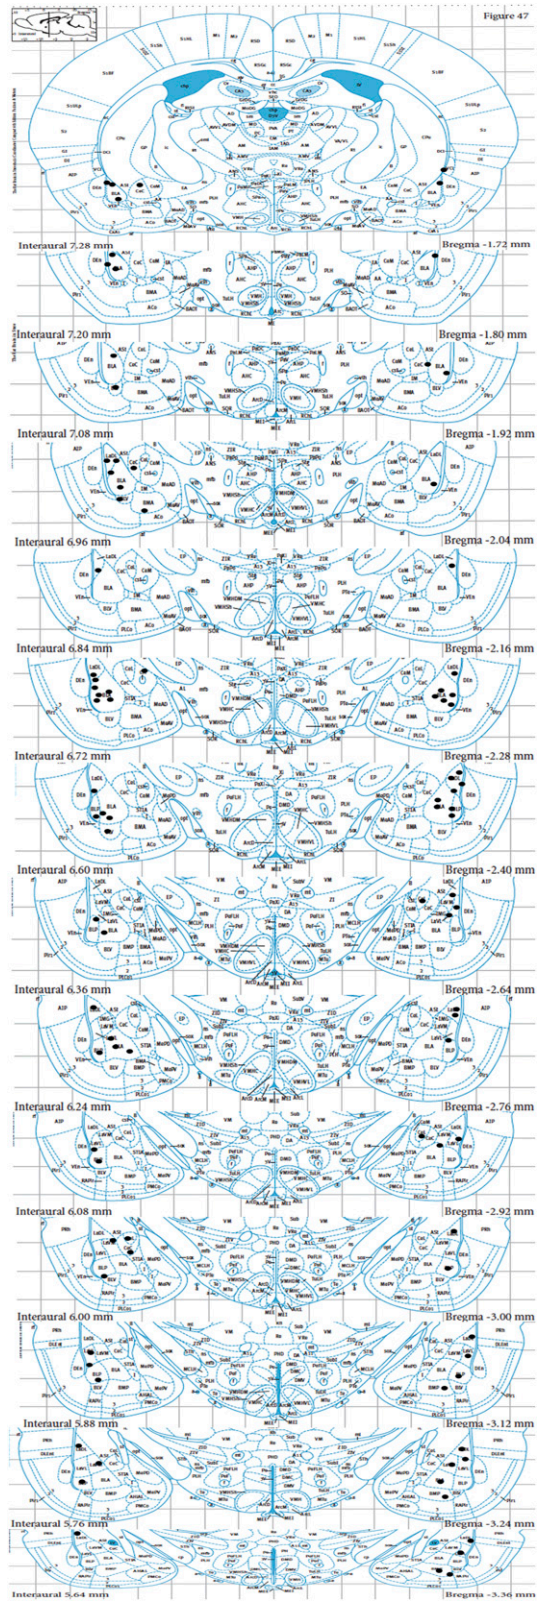

Fig. S4. Related to Fig. 5, shown are amygdala cannula placements in which schematics of brain sections are displayed from rostral to caudal.

**Table S1. Significant probes, depressive phenotype, and infant odor-shock conditioning vs. no shock**

| Gene_ID | Symbol     | Title                                                          | Min PFP | Fold  |
|---------|------------|----------------------------------------------------------------|---------|-------|
| 266803  | Sostdc1    | Sclerostin domain containing 1                                 | 0.000   | -7.61 |
| 57395   | Tmem27     | Transmembrane protein 27                                       | 0.000   | -7.15 |
| 24856   | Ttr        | Transthyretin                                                  | 0.000   | -7.10 |
| 315597  | Mfrp       | Membrane frizzled-related protein                              | 0.000   | -6.56 |
| 300920  | Cldn2      | Claudin 2                                                      | 0.000   | -6.21 |
| 304929  | F5         | Coagulation factor V (proaccelerin, labile factor)             | 0.000   | -6.16 |
| 80900   | Slco1a5    | Solute carrier organic anion transporter family, member 1a5    | 0.000   | -6.06 |
| 305858  | Otx2       | Orthodenticle homeobox 2                                       | 0.000   | -4.53 |
| 25258   | Glycam1    | Glycosylation dependent cell adhesion molecule 1               | 0.000   | -4.02 |
| 171049  | Folr1      | Folate receptor 1 (adult)                                      | 0.000   | -3.79 |
| 297738  | Steap1     | Six transmembrane epithelial antigen of the prostate 1         | 0.000   | -3.14 |
| 84024   | Pon1       | Paraoxonase 1                                                  | 0.000   | -2.92 |
| 309100  | Scgb1c1    | Secretoglobin, family 1C, member 1                             | 0.000   | -2.88 |
| 25250   | Cox8b      | Cytochrome c oxidase, subunit VIIIb                            | 0.000   | -2.68 |
| 500945  | RGD1561795 | Similar to RIKEN cDNA 1700012B09                               | 0.000   | -2.63 |
| 25240   | Aqp1       | Aquaporin 1                                                    | 0.000   | -2.61 |
| 311061  | Itgb6      | Integrin, beta 6                                               | 0.000   | -2.60 |
| 29354   | Pla2g5     | Phospholipase A2, group V                                      | 0.000   | -2.59 |
| 81512   | Lect1      | Leukocyte cell derived chemotaxin 1                            | 0.000   | -2.48 |
| 310836  | Abca4      | ATP-binding cassette, subfamily A (ABC1), member 4             | 0.000   | -2.34 |
| 24684   | Prlr       | Prolactin receptor                                             | 0.000   | -2.30 |
| 498278  | RGD1562658 | Similar to RIKEN cDNA 1700009P17                               | 0.000   | -2.28 |
| 294806  | C1qtnf3    | C1q and tumor necrosis factor related protein 3                | 0.000   | -2.21 |
| 305340  | Rbm47      | RNA binding motif protein 47                                   | 0.000   | -2.21 |
| 312086  | Pon3       | Paraoxonase 3                                                  | 0.000   | -2.17 |
| 24310   | Ace        | Angiotensin I converting enzyme (peptidyl-dipeptidase A) 1     | 0.000   | -2.10 |
| 308565  | Klk8       | Kallikrein related-peptidase 8                                 | 0.000   | 2.02  |
| 315820  | Myo5c      | Myosin VC                                                      | 0.000   | -1.98 |
| 366035  | Wdr38      | WD repeat domain 38                                            | 0.000   | -1.97 |
| 171138  | Kcne2      | Potassium voltage-gated channel, Isk-related subfamily, gene 2 | 0.000   | -1.94 |
| 294255  | Slc44a4    | Solute carrier family 44, member 4                             | 0.000   | -1.89 |
| 79247   | Htr5b      | 5-Hydroxytryptamine (serotonin) receptor 5B                    | 0.000   | 1.84  |
| 84050   | Enpp2      | Ectonucleotide pyrophosphatase/phosphodiesterase 2             | 0.000   | -1.83 |
| 289230  | Nhlh1      | Nescient helix loop helix 1                                    | 0.000   | 1.83  |
| 81710   | Msx1       | Msh homeobox 1                                                 | 0.000   | -1.81 |
| 25626   | Krt8       | Keratin 8                                                      | 0.000   | -1.79 |
| 83504   | Kl         | Klotho                                                         | 0.000   | -1.77 |
| 312677  | Ccdc77     | Coiled-coil domain containing 77                               | 0.000   | 1.75  |
| 81517   | Mdk        | Midkine                                                        | 0.000   | -1.70 |
| 361415  | Dynlrb2    | Dynein light chain roadblock-type 2                            | 0.000   | -1.68 |
| 116777  | Cdh3       | Cadherin 3                                                     | 0.000   | -1.68 |
| 266775  | Serpinb10  | Serpin peptidase inhibitor, clade B (ovalbumin), member 10     | 0.000   | 1.59  |
| 680802  | LOC680802  | Similar to Zinc finger protein 45 (BRC1744)                    | 0.000   | 1.59  |
| 192110  | Pou3f1     | POU class 3 homeobox 1                                         | 0.000   | 1.55  |
| 360613  | Ccdc49     | Coiled-coil domain containing 49                               | 0.000   | 1.49  |
| 313373  | Cyp2j10    | Cytochrome P450, family 2, subfamily j, polypeptide 10         | 0.000   | 1.46  |
| 192203  | Fap        | Fibroblast activation protein, alpha                           | 0.000   | 1.46  |
| 25400   | Camk2a     | Calcium/calmodulin-dependent protein kinase II alpha           | 0.000   | 1.44  |
| 65153   | Freq       | Frequenin homolog ( <i>Drosophila</i> )                        | 0.000   | 1.41  |
| 314416  | Ak7        | Adenylate kinase 7                                             | 0.000   | -1.58 |
| 301525  | Glb1l      | Galactosidase, beta 1-like                                     | 0.001   | -1.64 |
| 363144  | Cdh29      | Cadherin-like 29                                               | 0.001   | -1.59 |
| 362424  | Tmem72     | Transmembrane protein 72                                       | 0.001   | -1.64 |
| 300663  | Ccdc153    | Coiled-coil domain containing 153                              | 0.001   | -1.55 |
| 171045  | Mmp3       | Matrix metalloproteinase 3                                     | 0.001   | -1.59 |
| 304021  | Col8a1     | Collagen, type VIII, alpha 1                                   | 0.001   | -1.62 |
| 297444  | Ccdc37     | Coiled-coil domain containing 37                               | 0.001   | -1.59 |
| 654482  | LOC654482  | Hypothetical protein LOC654482                                 | 0.001   | -1.54 |
| 24780   | Slc4a2     | Solute carrier family 4 (anion exchanger), member 2            | 0.001   | -1.60 |
| 366366  | Igfbpl1    | Insulin-like growth factor binding protein-like 1              | 0.001   | -1.59 |
| 170496  | Lcn2       | Lipocalin 2                                                    | 0.001   | -1.39 |
| 691455  | Calml4     | Calmodulin-like 4                                              | 0.001   | -1.56 |
| 171339  | Dnah1      | Dynein, axonemal, heavy chain 1                                | 0.002   | -1.48 |

Table S1. Cont.

| Gene_ID | Symbol     | Title                                                                   | Min PFP | Fold  |
|---------|------------|-------------------------------------------------------------------------|---------|-------|
| 171409  | Tnnt1      | Troponin T type 1 (skeletal, slow)                                      | 0.002   | -1.49 |
| 315564  | Robo3      | Roundabout homolog 3 ( <i>Drosophila</i> )                              | 0.002   | 1.62  |
| 286918  | Mx2        | Myxovirus (influenza virus) resistance 2                                | 0.003   | 1.25  |
| 680210  | Pzca       | Prostate stem cell antigen                                              | 0.003   | -1.53 |
| 290354  | Pdlim2     | PDZ and LIM domain 2                                                    | 0.003   | -1.46 |
| 25662   | Igfbp2     | Insulin-like growth factor binding protein 2                            | 0.004   | -1.49 |
| 313495  | Car9       | Carbonic anhydrase 9                                                    | 0.004   | -1.45 |
| 64030   | Kit        | V-kit Hardy-Zuckerman 4 feline sarcoma viral oncogene homolog           | 0.004   | 1.44  |
| 114592  | Aurkb      | Aurora kinase B                                                         | 0.004   | -1.43 |
| 690286  | LOC690286  | Similar to hepatic leukemia factor                                      | 0.004   | 1.33  |
| 83502   | Cdh1       | Cadherin 1                                                              | 0.005   | 1.35  |
| 65129   | Cldn1      | Claudin 1                                                               | 0.005   | -1.44 |
| 306454  | Cldn22     | Claudin 22                                                              | 0.005   | -1.46 |
| 25049   | Atxn1      | Ataxin 1                                                                | 0.005   | 1.34  |
| 25102   | Chrna5     | Cholinergic receptor, nicotinic, alpha 5                                | 0.005   | 1.31  |
| 414788  | RT1-T24-3  | RT1 class I, locus T24, gene 3                                          | 0.005   | -1.57 |
| 290803  | Tex15      | Testis expressed 15                                                     | 0.005   | -1.49 |
| 293154  | Folr2      | Folate receptor 2 (fetal)                                               | 0.006   | 1.19  |
| 308958  | Cdr2       | Cerebellar degeneration-related 2                                       | 0.006   | -1.48 |
| 499017  | Sytl3      | Synaptotagmin-like 3                                                    | 0.006   | -1.46 |
| 301295  | Efhc1      | EF-hand domain (C-terminal) containing 1                                | 0.007   | -1.44 |
| 252959  | Dnah12     | Dynein, axonemal, heavy chain 12                                        | 0.007   | -1.46 |
| 499660  | Sprr1al    | Small proline-rich protein 1A-like                                      | 0.007   | -1.40 |
| 84550   | Slc24a2    | Solute carrier family 24 (sodium/potassium/calcium exchanger), member 2 | 0.008   | 1.39  |
| 25349   | Scn2b      | Sodium channel, voltage-gated, type II, beta                            | 0.008   | 1.40  |
| 288478  | RspH10b    | Radial spoke head 10 homolog B ( <i>Chlamydomonas</i> )                 | 0.008   | -1.42 |
| 361195  | Cdc14b     | CDC14 cell division cycle 14 homolog B ( <i>S. cerevisiae</i> )         | 0.009   | -1.42 |
| 298524  | Dnali1     | Dynein, axonemal, light intermediate chain 1                            | 0.009   | -1.44 |
| 24443   | Hdc        | Histidine decarboxylase                                                 | 0.009   | -1.55 |
| 290558  | Nt5dc2     | 5'-Nucleotidase domain containing 2                                     | 0.009   | -1.43 |
| 83687   | Defb1      | Defensin beta 1                                                         | 0.010   | 1.37  |
| 50555   | Ugt8       | UDP glycosyltransferase 8                                               | 0.010   | 1.33  |
| 315691  | Lingo1     | Leucine rich repeat and Ig domain containing 1                          | 0.011   | 1.25  |
| 290372  | RGD1560137 | Similar to expressed sequence AU021034                                  | 0.011   | -1.45 |
| 29279   | Meox2      | Mesenchyme homeobox 2                                                   | 0.012   | 1.37  |
| 498356  | Shisa3     | Shisa homolog 3 ( <i>Xenopus laevis</i> )                               | 0.012   | 1.25  |
| 299757  | Nts        | Neurotensin                                                             | 0.012   | 1.32  |
| 315731  | Larp6      | La ribonucleoprotein domain family, member 6                            | 0.012   | 1.44  |
| 361170  | Adam32     | ADAM metalloproteinase domain 32                                        | 0.012   | 1.29  |
| 294254  | Hspa1b     | Heat shock 70kD protein 1B (mapped)                                     | 0.012   | -1.24 |
| 58982   | Ncan       | Neurocan                                                                | 0.013   | 1.32  |
| 315609  | Cd3e       | CD3 molecule, epsilon                                                   | 0.013   | 1.78  |
| 56824   | Ifit1      | IFN-induced protein with tetratricopeptide repeats 1                    | 0.013   | 1.09  |
| 362867  | Mybpc1     | Myosin binding protein C, slow type                                     | 0.013   | 1.33  |
| 361993  | C2cd4d     | C2 calcium-dependent domain containing 4D                               | 0.013   | 1.37  |
| 310694  | Fcrls      | Fc receptor-like 5, scavenger receptor                                  | 0.015   | -1.58 |
| 310483  | Mlf1       | Myeloid leukemia factor 1                                               | 0.015   | -1.39 |
| 85270   | Tekt1      | Tektin 1                                                                | 0.015   | -1.40 |
| 25041   | P2rx6      | Purinergic receptor P2X, ligand-gated ion channel, 6                    | 0.015   | -1.40 |
| 287346  | Fam183b    | Family with sequence similarity 183, member B                           | 0.015   | -1.42 |
| 360478  | RGD1563547 | RGD1563547                                                              | 0.015   | -1.40 |
| 313592  | Col8a2     | Collagen, type VIII, alpha 2                                            | 0.015   | -1.36 |
| 499586  | Tmem212    | Transmembrane protein 212                                               | 0.015   | -1.37 |
| 84386   | Slpi       | Secretory leukocyte peptidase inhibitor                                 | 0.015   | -1.41 |
| 315611  | Scn4b      | Sodium channel, voltage-gated, type IV, beta                            | 0.015   | 1.32  |
| 691223  | LOC691223  | Hypothetical protein LOC691223                                          | 0.015   | -1.41 |
| 116506  | Calcr      | Calcitonin receptor                                                     | 0.016   | -1.25 |
| 289178  | Dpt        | Dermatopontin                                                           | 0.016   | -1.41 |
| 83567   | Mchr1      | Melanin-concentrating hormone receptor 1                                | 0.016   | 1.31  |
| 315863  | Ube2cbp    | Ubiquitin-conjugating enzyme E2C binding protein                        | 0.016   | -1.33 |



Table S1. Cont.

| Gene_ID   | Symbol       | Title                                                                    | Min PFP | Fold  |
|-----------|--------------|--------------------------------------------------------------------------|---------|-------|
| 305066    | Prox1        | Prospero homeobox 1                                                      | 0.016   | 1.38  |
| 362325    | Mdfic        | MyoD family inhibitor domain containing                                  | 0.017   | -1.36 |
| 24471     | Hspb1        | Heat shock protein 1                                                     | 0.017   | -1.41 |
| 25628     | Nkx2-1       | NK2 homeobox 1                                                           | 0.017   | -1.45 |
| 499991    | Steap4       | STEAP family member 4                                                    | 0.017   | -1.30 |
| 690188    | Fam168b      | Family with sequence similarity 168, member B                            | 0.019   | 1.25  |
| 50577     | Galr1        | Galanin receptor 1                                                       | 0.020   | -1.18 |
| 291847    | Ccdc113      | Coiled-coil domain containing 113                                        | 0.022   | -1.38 |
| 378947    | Bst2         | Bone marrow stromal cell antigen 2                                       | 0.023   | -1.35 |
| 363139    | Zmynd10      | Zinc finger, MYND-type containing 10                                     | 0.024   | -1.38 |
| 296608    | RGD1306233   | Similar to hypothetical protein MGC29761                                 | 0.024   | -1.33 |
| 305974    | Scara5       | Scavenger receptor class A, member 5 (putative)                          | 0.024   | -1.38 |
| 501185    | RGD1563692   | Similar to hypothetical protein FLJ22671                                 | 0.024   | -1.39 |
| 302991    | Tekt4        | Tektin 4                                                                 | 0.024   | -1.36 |
| 246245    | Fmo2         | Flavin containing monooxygenase 2                                        | 0.024   | -1.31 |
| 497957    | RGD1565611   | RGD1565611                                                               | 0.024   | -1.34 |
| 365972    | Bhmt2        | Betaine-homocysteine methyltransferase 2                                 | 0.025   | -1.32 |
| 304282    | Baiap2l1     | BAI1-associated protein 2-like 1                                         | 0.025   | -1.39 |
| 54237     | Cdk1         | Cyclin-dependent kinase 1                                                | 0.026   | -1.22 |
| 66026     | Trpv4        | Transient receptor potential cation channel, subfamily V, member 4       | 0.026   | -1.37 |
| 315741    | Paqr5        | Progesterin and adipoQ receptor family member V                          | 0.026   | -1.36 |
| 81686     | Mmp2         | Matrix metalloproteinase 2                                               | 0.028   | -1.38 |
| 293012    | Olig3        | Oligodendrocyte transcription factor 3                                   | 0.028   | -1.29 |
| 296610    | Rsb66        | Rsb-66 protein                                                           | 0.029   | -1.30 |
| 54410     | Enpp3        | Ectonucleotide pyrophosphatase/phosphodiesterase 3                       | 0.030   | -1.32 |
| 313057    | Serinc2      | Serine incorporator 2                                                    | 0.030   | -1.30 |
| 681288    | T2           | Brachyury 2                                                              | 0.033   | -1.32 |
| 406161    | C4-2         | Complement component 4, gene 2                                           | 0.033   | -1.26 |
| 100362950 | LOC100362950 | CG11699-like                                                             | 0.033   | -1.33 |
| 683514    | LOC683514    | Hypothetical protein LOC683514                                           | 0.035   | -1.34 |
| 500137    | Neurod6      | Neurogenic differentiation 6                                             | 0.036   | 1.29  |
| 50658     | Mapk9        | Mitogen-activated protein kinase 9                                       | 0.036   | 1.22  |
| 300870    | Fam46a       | Family with sequence similarity 46, member A                             | 0.037   | -1.34 |
| 252854    | Slc5a11      | Solute carrier family 5 (sodium/glucose cotransporter), member 11        | 0.038   | 1.20  |
| 360919    | LOC360919    | Similar to alpha-fetoprotein                                             | 0.039   | 1.13  |
| 29699     | Prkar2a      | Protein kinase, cAMP dependent regulatory, type II alpha                 | 0.039   | 1.38  |
| 362511    | Fbxo10       | F-box protein 10                                                         | 0.040   | 1.31  |
| 305441    | Sh3tc1       | SH3 domain and tetratricopeptide repeats 1                               | 0.040   | -1.28 |
| 293624    | Irf7         | IFN regulatory factor 7                                                  | 0.041   | -1.36 |
| 117548    | Kif1b        | Kinesin family member 1B                                                 | 0.041   | 1.21  |
| 295704    | Ube2l6       | Ubiquitin-conjugating enzyme E2L 6                                       | 0.043   | -1.34 |
| 307562    | Dsg2         | Desmoglein 2                                                             | 0.043   | -1.35 |
| 29413     | Adra1d       | Adrenergic, alpha-1D-, receptor                                          | 0.043   | 1.23  |
| 24785     | Slc9a4       | Solute carrier family 9 (sodium/hydrogen exchanger), member 4            | 0.044   | 1.28  |
| 299153    | RGD1309051   | Similar to chromosome 14 ORF 50                                          | 0.044   | -1.35 |
| 25611     | Otc          | Ornithine carbamoyltransferase                                           | 0.045   | -1.35 |
| 313479    | Orc1l        | Origin recognition complex, subunit 1-like (yeast)                       | 0.045   | 1.32  |
| 291541    | Cidea        | Cell death-inducing DFFA-like effector a                                 | 0.048   | -1.27 |
| 25456     | Glr3         | Glycine receptor, beta                                                   | 0.051   | 1.26  |
| 312912    | Prex2        | Phosphatidylinositol-3,4,5-trisphosphate-dependent Rac exchange factor 2 | 0.053   | 1.25  |
| 314964    | Phf20l1      | PHD finger protein 20-like 1                                             | 0.053   | 1.34  |
| 29503     | Slc22a2      | Solute carrier family 22 (organic cation transporter), member 2          | 0.057   | 1.23  |
| 60324     | Synpo        | Synaptopodin                                                             | 0.057   | 1.22  |
| 24477     | Ibsp         | Integrin-binding sialoprotein                                            | 0.057   | 1.36  |
| 78973     | Senp2        | Sumo1/sentrin/SMT3 specific peptidase 2                                  | 0.057   | 1.28  |
| 25292     | Apoc1        | Apolipoprotein C-I                                                       | 0.058   | 1.30  |
| 252958    | Iiig9        | III G9 protein                                                           | 0.058   | -1.31 |
| 292843    | Siglec5      | Sialic acid binding Ig-like lectin 5                                     | 0.059   | -1.11 |
| 24616     | Pah          | Phenylalanine hydroxylase                                                | 0.059   | 1.25  |

Table S1. Cont.

| Gene_ID   | Symbol       | Title                                                                                       | Min PFP | Fold  |
|-----------|--------------|---------------------------------------------------------------------------------------------|---------|-------|
| 114505    | Klf4         | Kruppel-like factor 4 (gut)                                                                 | 0.060   | 1.19  |
| 308794    | RGD1310371   | Similar to RIKEN cDNA 1700026D08                                                            | 0.061   | -1.26 |
| 24769     | Sct          | Secretin                                                                                    | 0.061   | -1.25 |
| 302507    | Efhc2        | EF-hand domain (C-terminal) containing 2                                                    | 0.062   | -1.31 |
| 117130    | Grifin       | Galectin-related interfiber protein                                                         | 0.068   | -1.26 |
| 24483     | Igf2         | Insulin-like growth factor 2                                                                | 0.069   | -1.23 |
| 25599     | Cd74         | Cd74 molecule, major histocompatibility complex, class II invariant chain                   | 0.070   | -1.28 |
| 252916    | Rab38        | RAB38, member RAS oncogene family                                                           | 0.070   | 1.21  |
| 690020    | LOC690020    | Similar to killer cell lectin-like receptor, subfamily A, member 17                         | 0.070   | -1.17 |
| 309888    | Sim1         | Single-minded homolog 1 ( <i>Drosophila</i> )                                               | 0.070   | -1.41 |
| 100359753 | LOC100359753 | Hypothetical protein LOC100359753                                                           | 0.071   | -1.25 |
| 312647    | Atg7         | ATG7 autophagy related 7 homolog ( <i>S. cerevisiae</i> )                                   | 0.071   | 1.25  |
| 303924    | Upk1b        | Uroplakin 1B                                                                                | 0.073   | 1.24  |
| 25513     | Pik3r1       | Phosphoinositide-3-kinase, regulatory subunit 1 (alpha)                                     | 0.073   | 1.22  |
| 361818    | Rsph1        | Radial spoke head 1 homolog ( <i>Chlamydomonas</i> )                                        | 0.075   | -1.31 |
| 360605    | Epn3         | Epsin 3                                                                                     | 0.076   | -1.30 |
| 309526    | Ifit3        | IFN-induced protein with tetratricopeptide repeats 3                                        | 0.076   | 1.14  |
| 361300    | Mocos        | Molybdenum cofactor sulfurase                                                               | 0.077   | -1.27 |
| 171519    | Calcb        | Calcitonin-related polypeptide, beta                                                        | 0.077   | 1.28  |
| 84020     | Kcnq1        | Potassium voltage-gated channel, KQT-like subfamily, member 1                               | 0.077   | -1.30 |
| 29248     | Tnni3        | Troponin I type 3 (cardiac)                                                                 | 0.078   | -1.28 |
| 366140    | Fjx1         | Four jointed box 1 ( <i>Drosophila</i> )                                                    | 0.079   | -1.67 |
| 315427    | Sesn3        | Sestrin 3                                                                                   | 0.079   | -1.17 |
| 368066    | Inmt         | Indolethylamine <i>N</i> -methyltransferase                                                 | 0.081   | -1.19 |
| 25369     | Adora2a      | Adenosine A2a receptor                                                                      | 0.081   | -1.22 |
| 309368    | Lama2        | Laminin, alpha 2                                                                            | 0.081   | -1.29 |
| 171163    | Slc6a13      | Solute carrier family 6 (neurotransmitter transporter, GABA), member 13                     | 0.082   | 1.23  |
| 24974     | RT1-A2       | RT1 class Ia, locus A2                                                                      | 0.082   | -1.28 |
| 302996    | RGD1560244   | Similar to hypothetical protein FLJ34512                                                    | 0.082   | -1.28 |
| 303772    | Slc16a6      | Solute carrier family 16, member 6 (monocarboxylic acid transporter 7)                      | 0.083   | -1.29 |
| 362708    | Trim54       | Tripartite motif-containing 54                                                              | 0.084   | -1.16 |
| 64536     | Esm1         | Endothelial cell-specific molecule 1                                                        | 0.085   | -1.24 |
| 688394    | Mab2111      | Mab-21-like 1 ( <i>C. elegans</i> )                                                         | 0.085   | -1.20 |
| 690825    | Gngt2        | Guanine nucleotide binding protein (G protein), gamma transducing activity polypeptide 2    | 0.085   | -1.26 |
| 502684    | LOC502684    | Hypothetical protein LOC502684                                                              | 0.085   | -1.27 |
| 302554    | Glod5        | Glyoxalase domain containing 5                                                              | 0.086   | -1.28 |
| 114587    | Dlk1         | Delta-like 1 homolog ( <i>Drosophila</i> )                                                  | 0.086   | -1.32 |
| 305135    | Lrrc8b       | Leucine rich repeat containing 8 family, member B                                           | 0.087   | 1.25  |
| 81780     | Ccl5         | Chemokine (C-C motif) ligand 5                                                              | 0.088   | -1.32 |
| 309242    | Gna14        | Guanine nucleotide binding protein, alpha 14                                                | 0.089   | 1.24  |
| 307767    | Frem3        | FRAS1 related extracellular matrix 3                                                        | 0.089   | -1.28 |
| 266774    | Znf597       | Zinc finger protein 597                                                                     | 0.090   | -1.10 |
| 311151    | Dusp19       | Dual specificity phosphatase 19                                                             | 0.090   | 1.21  |
| 24688     | Prph         | Peripherin                                                                                  | 0.092   | -1.20 |
| 29755     | Colq         | Collagen-like tail subunit (single strand of homotrimer) of asymmetric acetylcholinesterase | 0.093   | -1.23 |
| 292697    | Apoc2        | Apolipoprotein C-II                                                                         | 0.093   | -1.27 |
| 310707    | Chd1l        | Chromodomain helicase DNA binding protein 1-like                                            | 0.094   | -1.21 |
| 24954     | Insr         | Insulin receptor                                                                            | 0.096   | 1.14  |
| 294071    | Hells        | Helicase, lymphoid specific                                                                 | 0.098   | 1.28  |
| 307486    | Pcdhb22      | Protocadherin beta 22                                                                       | 0.098   | 1.21  |
| 83781     | Lgals3       | Lectin, galactoside-binding, soluble, 3                                                     | 0.099   | -1.32 |
| 24659     | Pmch         | Promelanin-concentrating hormone                                                            | 0.099   | -1.67 |

Entries are ordered by the minimum pfp value. Probes were up-regulated if the gene expression of the infant paired was greater than no shock. This classification captured the majority of probes with high fold changes. Only tyrosine hydroxylase (Th; fold = 1.54) and paired-like homeodomain 2 (Pitx2; fold = 1.62) exceeded fold >1.5 but were not significant by the minimum pfp score.

**Table S2. Significant probes, rescue phenotype, and FST with and without infant conditioned odor**

| Gene_ID | Symbol     | Title                                                       | Min PFP | Fold  |
|---------|------------|-------------------------------------------------------------|---------|-------|
| 57395   | Tmem27     | Transmembrane protein 27                                    | 0.000   | 3.45  |
| 4266803 | Sostdc1    | Sclerostin domain containing 1                              | 0.000   | 3.44  |
| 80900   | Slco1a5    | Solute carrier organic anion transporter family, member 1a5 | 0.000   | 3.36  |
| 300920  | Cldn2      | Claudin 2                                                   | 0.000   | 3.28  |
| 304929  | F5         | Coagulation factor V (proaccelerin, labile factor)          | 0.000   | 3.06  |
| 315597  | Mfrp       | Membrane frizzled-related protein                           | 0.000   | 3.02  |
| 24856   | Ttr        | Transthyretin                                               | 0.000   | 3.00  |
| 171049  | Folr1      | Folate receptor 1 (adult)                                   | 0.000   | 2.81  |
| 81512   | Lect1      | Leukocyte cell derived chemotaxin 1                         | 0.000   | 2.73  |
| 305858  | Otx2       | Orthodenticle homeobox 2                                    | 0.000   | 2.72  |
| 84024   | Pon1       | Paraoxonase 1                                               | 0.000   | 2.40  |
| 25258   | Glycam1    | Glycosylation dependent cell adhesion molecule 1            | 0.000   | 2.37  |
| 297738  | Steap1     | Six transmembrane epithelial antigen of the prostate 1      | 0.000   | 2.28  |
| 500945  | RGD1561795 | Similar to RIKEN cDNA 1700012B09                            | 0.000   | 2.15  |
| 308565  | Klk8       | Kallikrein related-peptidase 8                              | 0.000   | -2.14 |
| 29354   | Pla2g5     | Phospholipase A2, group V                                   | 0.000   | 2.08  |
| 289230  | Nhlh1      | Nescient helix loop helix 1                                 | 0.000   | -2.07 |
| 25240   | Aqp1       | Aquaporin 1                                                 | 0.000   | 2.06  |
| 498278  | RGD1562658 | Similar to RIKEN cDNA 1700009P17                            | 0.000   | 2.01  |
| 294806  | C1qtnf3    | C1q and tumor necrosis factor related protein 3             | 0.000   | 1.98  |
| 25250   | Pon3       | Paraoxonase 3                                               | 0.000   | 1.95  |
| 311061  | Abca4      | ATP-binding cassette, subfamily A (ABC1), member 4          | 0.000   | 1.93  |
| 312086  | Slc44a4    | Solute carrier family 44, member 4                          | 0.000   | 1.90  |
| 310836  | Prlr       | Prolactin receptor                                          | 0.000   | 1.87  |
| 309100  | Wdr38      | WD repeat domain 38                                         | 0.000   | 1.86  |
| 294255  | Myo5c      | Myosin VC                                                   | 0.000   | 1.81  |
| 305340  | Robo3      | Roundabout homolog 3 ( <i>Drosophila</i> )                  | 0.000   | -1.75 |
| 24684   | Krt8       | Keratin 8                                                   | 0.000   | 1.75  |
| 366035  | Cdh29      | Cadherin-like 29                                            | 0.000   | 1.70  |
| 286918  | Htr5b      | 5-Hydroxytryptamine (serotonin) receptor 5B                 | 0.000   | -1.64 |
| 366140  | Fap        | Fibroblast activation protein, alpha                        | 0.000   | -1.63 |
| 315820  | Pou3f1     | POU class 3 homeobox 1                                      | 0.000   | -1.58 |
| 362424  | Slc35d3    | Solute carrier family 35, member D3                         | 0.000   | -1.49 |
| 315564  | Adam32     | ADAM metallopeptidase domain 32                             | 0.000   | -1.49 |
| 25626   | Dnah1      | Dynein, axonemal, heavy chain 1                             | 0.000   | 1.58  |
| 315609  | Scgb1c1    | Secretoglobin, family 1C, member 1                          | 0.000   | 1.92  |
| 363144  | LOC654482  | Hypothetical protein LOC654482                              | 0.000   | 1.62  |
| 24310   | Aurkb      | Aurora kinase B                                             | 0.000   | 1.57  |
| 81710   | Scara5     | Scavenger receptor class A, member 5 (putative)             | 0.000   | 1.65  |
| 84386   | Dynlrb2    | Dynein light chain roadblock-type 2                         | 0.000   | 1.63  |
| 305974  | Tmem72     | Transmembrane protein 72                                    | 0.000   | 1.78  |
| 79247   | Ak7        | Adenylate kinase 7                                          | 0.000   | 1.61  |
| 361415  | Itgb6      | Integrin, beta 6                                            | 0.000   | 1.96  |
| 192203  | Cox8b      | Cytochrome c oxidase, subunit VIIIb                         | 0.000   | 1.97  |
| 654482  | Rbm47      | RNA binding motif protein 47                                | 0.000   | 1.89  |
| 314416  | Serpib2    | Serpin peptidase inhibitor, clade B (ovalbumin), member 2   | 0.001   | 1.49  |
| 171339  | Mx2        | Myxovirus (influenza virus) resistance 2                    | 0.001   | 1.83  |
| 192110  | Slpi       | Secretory leukocyte peptidase inhibitor                     | 0.001   | 1.66  |
| 315611  | Ace        | Angiotensin I converting enzyme (peptidyl-dipeptidase A) 1  | 0.001   | 1.70  |
| 171138  | Msx1       | Msh homeobox 1                                              | 0.001   | 1.68  |
| 114592  | Steap4     | STEAP family member 4                                       | 0.001   | 1.55  |
| 499991  | Ccdc49     | Coiled-coil domain containing 49                            | 0.001   | -1.31 |
| 680210  | Ccdc153    | Coiled-coil domain containing 153                           | 0.001   | 1.46  |
| 83504   | Prox1      | Prospero homeobox 1                                         | 0.002   | -1.50 |
| 252959  | Meox2      | Mesenchyme homeobox 2                                       | 0.002   | -1.43 |
| 306454  | Chrna5     | Cholinergic receptor, nicotinic, alpha 5                    | 0.002   | -1.45 |
| 301525  | LOC680802  | Similar to Zinc finger protein 45 (BRC1744)                 | 0.002   | -1.44 |
| 84050   | Freq       | Frequenin homolog ( <i>Drosophila</i> )                     | 0.002   | -1.21 |
| 297444  | Larp6      | La ribonucleoprotein domain family, member 6                | 0.002   | -1.47 |
| 305066  | Cyp2j10    | Cytochrome P450, family 2, subfamily j, polypeptide 10      | 0.002   | -1.45 |
| 308717  | Fjx1       | Four jointed box 1 ( <i>Drosophila</i> )                    | 0.002   | -1.82 |
| 361170  | Kl         | Klotho                                                      | 0.002   | 1.52  |
| 60325   | Cldn22     | Claudin 22                                                  | 0.003   | 1.51  |

Table S2. Cont.

| Gene_ID | Symbol     | Title                                                              | Min PFP | Fold  |
|---------|------------|--------------------------------------------------------------------|---------|-------|
| 691455  | Inmt       | Indolethylamine <i>N</i> -methyltransferase                        | 0.003   | 1.42  |
| 64536   | Folr2      | Folate receptor 2 (fetal)                                          | 0.003   | -1.29 |
| 24780   | Calml4     | Calmodulin-like 4                                                  | 0.003   | 1.49  |
| 290803  | Psca       | Prostate stem cell antigen                                         | 0.003   | 1.55  |
| 81517   | Kcne2      | Potassium voltage-gated channel, Isk-related subfamily, gene 2     | 0.003   | 1.57  |
| 315731  | Dnah12     | Dynein, axonemal, heavy chain 12                                   | 0.003   | 1.52  |
| 300663  | Ccdc37     | Coiled-coil domain containing 37                                   | 0.003   | 1.50  |
| 691223  | Scn4b      | Sodium channel, voltage-gated, type IV, beta                       | 0.003   | -1.58 |
| 313495  | Tex15      | Testis expressed 15                                                | 0.003   | 1.48  |
| 25102   | Car9       | Carbonic anhydrase 9                                               | 0.003   | 1.45  |
| 310483  | RGD1563692 | Similar to hypothetical protein FLJ22671                           | 0.003   | 1.43  |
| 66026   | LOC690286  | Similar to hepatic leukemia factor                                 | 0.003   | -1.37 |
| 313373  | RGD1310371 | Similar to RIKEN cDNA 1700026D08                                   | 0.003   | 1.44  |
| 84020   | Col8a1     | Collagen, type VIII, alpha 1                                       | 0.003   | 1.42  |
| 301295  | Cdh3       | Cadherin 3                                                         | 0.003   | 1.44  |
| 680802  | Glb1l      | Galactosidase, beta 1-like                                         | 0.003   | 1.51  |
| 308794  | Slc4a2     | Solute carrier family 4 (anion exchanger), member 2                | 0.003   | 1.48  |
| 116777  | LOC360919  | Similar to alpha-fetoprotein                                       | 0.003   | -1.26 |
| 65129   | Enpp2      | Ectonucleotide pyrophosphatase/phosphodiesterase 2                 | 0.003   | 1.51  |
| 29279   | Mlf1       | Myeloid leukemia factor 1                                          | 0.004   | 1.45  |
| 501185  | Cldn1      | Claudin 1                                                          | 0.004   | 1.43  |
| 366366  | LOC679818  | Similar to Maltase-glucoamylase, intestinal                        | 0.004   | -1.42 |
| 365972  | Mdk        | Midkine                                                            | 0.004   | 1.47  |
| 287346  | Fam159b    | Family with sequence similarity 159, member B                      | 0.004   | -1.34 |
| 368066  | Camk2a     | Calcium/calmodulin-dependent protein kinase II alpha               | 0.004   | -1.22 |
| 679818  | Kcnq1      | Potassium voltage-gated channel, KQT-like subfamily, member 1      | 0.005   | 1.44  |
| 304021  | Trpv4      | Transient receptor potential cation channel, subfamily V, member 4 | 0.005   | 1.45  |
| 81686   | Igf1bp1    | Insulin-like growth factor binding protein-like 1                  | 0.005   | 1.43  |
| 288478  | Amy1a      | Amylase, alpha 1A (salivary)                                       | 0.005   | 1.16  |
| 298524  | Mmp2       | Matrix metalloproteinase 2                                         | 0.005   | 1.42  |
| 300870  | Efhc1      | EF-hand domain (C-terminal) containing 1                           | 0.005   | 1.44  |
| 499017  | LOC691223  | Hypothetical protein LOC691223                                     | 0.005   | 1.46  |
| 290372  | Dsg2       | Desmoglein 2                                                       | 0.005   | 1.36  |
| 363139  | Rsb66      | Rsb-66 protein                                                     | 0.005   | 1.36  |
| 360478  | RGD1306233 | Similar to hypothetical protein MGC29761                           | 0.005   | 1.37  |
| 295337  | Fmo2       | Flavin containing monooxygenase 2                                  | 0.006   | 1.32  |
| 24477   | Dnali1     | Dynein, axonemal, light intermediate chain 1                       | 0.006   | 1.41  |
| 24805   | Rsph10b    | Radial spoke head 10 homolog B (Chlamydomonas)                     | 0.006   | 1.41  |
| 690286  | Syt13      | Synaptotagmin-like 3                                               | 0.006   | 1.40  |
| 681288  | Esm1       | Endothelial cell-specific molecule 1                               | 0.006   | 1.48  |
| 171519  | Olig3      | Oligodendrocyte transcription factor 3                             | 0.006   | 1.36  |
| 296608  | Ifit1      | IFN-induced protein with tetratricopeptide repeats 1               | 0.006   | -1.26 |
| 290354  | Fam183b    | Family with sequence similarity 183, member B                      | 0.006   | 1.43  |
| 309526  | Cdr2       | Cerebellar degeneration-related 2                                  | 0.006   | 1.36  |
| 499660  | Mybpc1     | Myosin binding protein C, slow type                                | 0.006   | -1.36 |
| 25662   | RGD1562344 | Similar to Gm566 protein                                           | 0.007   | 1.39  |
| 291847  | Calcb      | Calcitonin-related polypeptide, beta                               | 0.007   | -1.37 |
| 85270   | Pdlim2     | PDZ and LIM domain 2                                               | 0.007   | 1.37  |
| 290558  | Ifit3      | IFN-induced protein with tetratricopeptide repeats 3               | 0.007   | -1.36 |
| 362867  | Tc2n       | Tandem C2 domains, nuclear                                         | 0.007   | 1.36  |
| 296610  | Fam46a     | Family with sequence similarity 46, member A                       | 0.007   | 1.40  |
| 302934  | Tnni3      | Troponin I type 3 (cardiac)                                        | 0.008   | 1.35  |
| 307562  | Nts        | Neurotensin                                                        | 0.008   | -1.29 |
| 500707  | Ccdc77     | Coiled-coil domain containing 77                                   | 0.009   | -1.20 |
| 293012  | RGD1560137 | Similar to expressed sequence AU021034                             | 0.009   | 1.39  |
| 308958  | Calcr      | Calcitonin receptor                                                | 0.009   | 1.31  |
| 29248   | Tekt1      | Tektin 1                                                           | 0.010   | 1.36  |
| 291962  | Igf1bp2    | Insulin-like growth factor binding protein 2                       | 0.011   | 1.36  |
| 499586  | Nt5dc2     | 5'-Nucleotidase domain containing 2                                | 0.011   | 1.36  |
| 499765  | Lingo1     | Leucine rich repeat and Ig domain containing 1                     | 0.012   | -1.18 |
| 25041   | Tnnt1      | Troponin T type 1 (skeletal, slow)                                 | 0.013   | 1.32  |
| 304282  | Zmynd10    | Zinc finger, MYND-type containing 10                               | 0.013   | 1.39  |

Table S2. Cont.

| Gene_ID   | Symbol       | Title                                                                                        | Min PFP | Fold  |
|-----------|--------------|----------------------------------------------------------------------------------------------|---------|-------|
| 29699     | T2           | Brachyury 2                                                                                  | 0.013   | 1.37  |
| 59109     | Tmem212      | Transmembrane protein 212                                                                    | 0.014   | 1.35  |
| 499520    | Grifin       | Galectin-related interfiber protein                                                          | 0.015   | -1.27 |
| 100359739 | RGD1563547   | RGD1563547                                                                                   | 0.016   | 1.39  |
| 302507    | Ccdc113      | Coiled-coil domain containing 113                                                            | 0.018   | 1.36  |
| 64555     | Dmkn         | Dermokine                                                                                    | 0.018   | -1.26 |
| 683514    | Dpt          | Dermatopontin                                                                                | 0.018   | 1.24  |
| 24710     | Rbp2         | Retinol binding protein 2, cellular                                                          | 0.018   | 1.32  |
| 474143    | Clecsf6      | C-type (calcium dependent, carbohydrate recognition domain) lectin, superfamily member 6     | 0.020   | -1.32 |
| 246245    | Shisa3       | Shisa homolog 3 ( <i>Xenopus laevis</i> )                                                    | 0.021   | -1.20 |
| 361818    | Serpibn10    | Serpin peptidase inhibitor, clade B (ovalbumin), member 10                                   | 0.021   | -1.24 |
| 171409    | Baiap2l1     | BAI1-associated protein 2-like 1                                                             | 0.021   | 1.34  |
| 245955    | RGD1564114   | Similar to FLJ46082 protein                                                                  | 0.021   | 1.34  |
| 116506    | Gpx2         | Glutathione peroxidase 2                                                                     | 0.024   | -1.28 |
| 360613    | Cidea        | Cell death-inducing DFFA-like effector a                                                     | 0.024   | 1.24  |
| 54289     | Rgs1         | Regulator of G protein signaling 1                                                           | 0.025   | -1.31 |
| 362285    | Cdh1         | Cadherin 1                                                                                   | 0.025   | -1.27 |
| 502684    | Sprr1al      | Small proline-rich protein 1A-like                                                           | 0.025   | -1.36 |
| 298534    | Epb4.1l5     | Erythrocyte protein band 4.1-like 5                                                          | 0.025   | 1.25  |
| 363654    | Bmper        | BMP-binding endothelial regulator                                                            | 0.025   | -1.26 |
| 305078    | Efhc2        | EF-hand domain (C-terminal) containing 2                                                     | 0.027   | 1.33  |
| 293154    | Znf597       | Zinc finger protein 597                                                                      | 0.027   | 1.19  |
| 681210    | Galr1        | Galanin receptor 1                                                                           | 0.027   | 1.20  |
| 299757    | Lgals3bp     | Lectin, galactoside-binding, soluble, 3 binding protein                                      | 0.027   | 1.31  |
| 315665    | LOC100359739 | F-box and leucine-rich repeat protein 13-like                                                | 0.028   | 1.33  |
| 29190     | Pik3r1       | Phosphoinositide-3-kinase, regulatory subunit 1 (alpha)                                      | 0.029   | -1.18 |
| 24471     | Cdc14b       | CDC14 cell division cycle 14 homolog B ( <i>S. cerevisiae</i> )                              | 0.031   | 1.28  |
| 315741    | Myh3         | Myosin, heavy chain 3, skeletal muscle, embryonic                                            | 0.031   | -1.17 |
| 361195    | Siglec5      | Sialic acid binding Ig-like lectin 5                                                         | 0.031   | 1.08  |
| 311821    | LOC502684    | Hypothetical protein LOC502684                                                               | 0.031   | 1.30  |
| 363674    | P2rx6        | Purinergic receptor P2X, ligand-gated ion channel, 6                                         | 0.031   | 1.34  |
| 114246    | Spef2        | Sperm flagellar 2                                                                            | 0.032   | 1.32  |
| 29326     | LOC100362102 | LSM14 homolog B                                                                              | 0.033   | -1.19 |
| 685158    | Col9a3       | Procollagen, type IX, alpha 3                                                                | 0.034   | 1.30  |
| 25628     | Paqr5        | Progesterin and adipoQ receptor family member V                                              | 0.034   | 1.29  |
| 83502     | Col8a2       | Collagen, type VIII, alpha 2                                                                 | 0.035   | 1.24  |
| 59296     | Lrrc36       | Leucine rich repeat containing 36                                                            | 0.035   | 1.27  |
| 302554    | LOC100359753 | Hypothetical protein LOC100359753                                                            | 0.036   | 1.26  |
| 25611     | Hspa1b       | Heat shock 70kD protein 1B (mapped)                                                          | 0.036   | 1.23  |
| 252859    | Tmem2        | Transmembrane protein 2                                                                      | 0.036   | 1.04  |
| 315645    | Trim54       | Tripartite motif-containing 54                                                               | 0.038   | 1.25  |
| 291388    | Elmo3        | Engulfment and cell motility 3                                                               | 0.038   | 1.35  |
| 117130    | Igf2         | Insulin-like growth factor 2                                                                 | 0.038   | 1.25  |
| 24840     | LOC290595    | Hypothetical gene supported by AF152002                                                      | 0.040   | -1.22 |
| 296369    | Abcc6        | ATP-binding cassette, subfamily C (CFTR/MRP), member 6                                       | 0.040   | 1.26  |
| 497957    | Clspn        | Claspin homolog ( <i>Xenopus laevis</i> )                                                    | 0.040   | -1.30 |
| 298282    | LOC683514    | Hypothetical protein LOC683514                                                               | 0.041   | 1.32  |
| 361394    | Agpat2       | 1-Acylglycerol-3-phosphate O-acyltransferase 2 (lysophosphatidic acid acyltransferase, beta) | 0.041   | 1.28  |
| 306761    | Tmigd1       | Transmembrane and Ig domain containing 1                                                     | 0.043   | 1.30  |
| 314386    | Rsph1        | Radial spoke head 1 homolog ( <i>Chlamydomonas</i> )                                         | 0.043   | 1.32  |
| 24278     | Mmp9         | Matrix metalloproteinase 9                                                                   | 0.044   | -1.25 |
| 171287    | Cd3e         | CD3 molecule, epsilon                                                                        | 0.044   | -1.72 |
| 294449    | Ppl          | Periplakin                                                                                   | 0.047   | -1.36 |
| 300455    | MGC116202    | Hypothetical protein LOC688736                                                               | 0.048   | 1.25  |
| 363632    | Tmem100      | Transmembrane protein 100                                                                    | 0.049   | 1.26  |
| 79110     | Ptk2b        | PTK2B protein tyrosine kinase 2 beta                                                         | 0.049   | 1.25  |
| 297804    | Htr2b        | 5-Hydroxytryptamine (serotonin) receptor 2B                                                  | 0.049   | 1.25  |
| 56824     | Nkx2-1       | NK2 homeobox 1                                                                               | 0.049   | 1.28  |
| 308015    | Mx1          | Myxovirus (influenza virus) resistance 1                                                     | 0.050   | 1.14  |
| 81642     | Ccdc117      | Coiled-coil domain containing 117                                                            | 0.050   | 1.25  |

Table S2. Cont.

| Gene_ID   | Symbol       | Title                                                                                      | Min PFP | Fold  |
|-----------|--------------|--------------------------------------------------------------------------------------------|---------|-------|
| 308212    | Mocos        | Molybdenum cofactor sulfurase                                                              | 0.050   | 1.24  |
| 498060    | Lamb3        | Laminin, beta 3                                                                            | 0.051   | -1.30 |
| 298532    | Lcn2         | Lipocalin 2                                                                                | 0.052   | 1.18  |
| 360919    | Hspb1        | Heat shock protein 1                                                                       | 0.052   | 1.29  |
| 100359753 | Mdfic        | MyoD family inhibitor domain containing                                                    | 0.055   | 1.25  |
| 361548    | Glod5        | Glyoxalase domain containing 5                                                             | 0.055   | 1.27  |
| 497979    | Otc          | Ornithine carbamoyltransferase                                                             | 0.056   | 1.27  |
| 100361383 | Lama2        | Laminin, alpha 2                                                                           | 0.056   | 1.24  |
| 24483     | Stra6        | Stimulated by retinoic acid gene 6                                                         | 0.056   | 1.19  |
| 316273    | Dnase2b      | DNase II beta                                                                              | 0.059   | -1.27 |
| 498404    | Ibsp         | Integrin-binding sialoprotein                                                              | 0.059   | -1.38 |
| 81687     | Mfap5        | Microfibrillar associated protein 5                                                        | 0.059   | -1.25 |
| 29581     | MGC94891     | Hypothetical protein LOC681210                                                             | 0.061   | 1.29  |
| 25341     | Bhmt2        | Betaine-homocysteine methyltransferase 2                                                   | 0.062   | 1.43  |
| 500590    | Nostrin      | Nitric oxide synthase trafficker                                                           | 0.062   | 1.25  |
| 362708    | Ctsc         | Cathepsin C                                                                                | 0.062   | 1.21  |
| 304733    | Epn3         | Epsin 3                                                                                    | 0.062   | 1.21  |
| 688736    | Mcm3         | Minichromosome maintenance complex component 3                                             | 0.063   | 1.25  |
| 362429    | Crygd        | Crystallin, gamma D                                                                        | 0.064   | -1.26 |
| 362325    | Prkar2a      | Protein kinase, cAMP dependent regulatory, type II alpha                                   | 0.066   | -1.34 |
| 50646     | Pdyn         | Prodynorphin                                                                               | 0.067   | -1.29 |
| 252958    | Nudt7        | Nudix (nucleoside diphosphate linked moiety X)-type motif 7                                | 0.067   | 1.25  |
| 311111    | Atxn1        | Ataxin 1                                                                                   | 0.067   | -1.07 |
| 64626     | RGD1561916   | Similar to testes development-related NYD-SP22 isoform 1                                   | 0.067   | 1.25  |
| 289733    | RGD1565611   | RGD1565611                                                                                 | 0.067   | 1.27  |
| 500441    | Tnfrsf9      | Tumor necrosis factor receptor superfamily, member 9                                       | 0.070   | -1.25 |
| 361413    | Trpv6        | Transient receptor potential cation channel, subfamily V, member 6                         | 0.070   | -1.28 |
| 64507     | Odf3b        | Outer dense fiber of sperm tails 3B                                                        | 0.070   | 1.24  |
| 56781     | Mepe         | Matrix extracellular phosphoglycoprotein                                                   | 0.070   | 1.26  |
| 53949     | LOC100361383 | Extracellular matrix protein 2-like                                                        | 0.070   | 1.25  |
| 25085     | Ncan         | Neurocan                                                                                   | 0.071   | -1.17 |
| 25148     | Egflam       | EGF-like, fibronectin type III and laminin G domains                                       | 0.071   | 1.05  |
| 316238    | RGD1311251   | Similar to RIKEN cDNA 4930550C14                                                           | 0.071   | 1.29  |
| 291541    | Cxcl13       | Chemokine (C-X-C motif) ligand 13                                                          | 0.075   | -1.19 |
| 309368    | liig9        | IIIIG9 protein                                                                             | 0.079   | 1.25  |
| 287424    | Tekt2        | Tektin 2 (testicular)                                                                      | 0.080   | 1.26  |
| 361129    | Slc16a6      | Solute carrier family 16, member 6 (monocarboxylic acid transporter 7)                     | 0.081   | 1.24  |
| 289178    | Gpr88        | G protein coupled receptor 88                                                              | 0.082   | -1.22 |
| 313592    | Tnnc2        | Troponin C type 2 (fast)                                                                   | 0.085   | -1.27 |
| 312707    | Sirt4        | Sirtuin (silent mating type information regulation 2 homolog) 4 ( <i>S. cerevisiae</i> )   | 0.086   | 1.23  |
| 59320     | Gal          | Galanin prepropeptide                                                                      | 0.089   | 1.09  |
| 266775    | Pah          | Phenylalanine hydroxylase                                                                  | 0.089   | -1.23 |
| 361300    | Syt2         | Synaptotagmin II                                                                           | 0.091   | -1.37 |
| 100363441 | Antxr1       | Anthrax toxin receptor 1                                                                   | 0.092   | 1.20  |
| 500566    | LOC685158    | Similar to CG8138-PA                                                                       | 0.092   | 1.28  |
| 303772    | Fscn2        | Fascin homolog 2, actin-bundling protein, retinal ( <i>Strongylocentrotus purpuratus</i> ) | 0.092   | 1.22  |
| 500917    | Upk1b        | Uroplakin 1B                                                                               | 0.094   | -1.20 |
| 362712    | Slc22a2      | Solute carrier family 22 (organic cation transporter), member 2                            | 0.094   | -1.21 |
| 60563     | Slc24a2      | Solute carrier family 24 (sodium/potassium/calcium exchanger), member 2                    | 0.096   | -1.23 |
| 294254    | Pih1d2       | PIH1 domain containing 2                                                                   | 0.100   | 1.27  |

Details are as for Table S1. Up-regulated genes had higher expression levels in the "Odor" condition compared with the "No odor" condition in the FST. No probes with a pfp >0.10 criteria exceeded a fold >1.50.

**Table S3. Genes/gene groups for canonical paths for Fig. 4A**

| Entrez gene name                                                  | Symbol      | Entrez gene ID |
|-------------------------------------------------------------------|-------------|----------------|
| <b>AMPK signaling</b>                                             |             |                |
| Adrenergic receptor, alpha 1d                                     | ADRA1D      | 29413          |
| Adrenergic receptor, beta 3                                       | ADRB3       | 25645          |
| Alpha serine-threonine protein kinase                             | Akt         | Group          |
| G protein-coupled receptor                                        | Gpcr        | Group          |
| p85 Pi3kinase                                                     | p85 (pik3r) | Group          |
| p85- $\alpha$ regulatory subunit of phosphatidylinositol 3-kinase | PIK3R1      | 25513          |
| Protein phosphatase type 2a                                       | PP2A        | Complex        |
| <b>CREB signaling in neurons</b>                                  |             |                |
| 14-3-3                                                            | CBB         | Group          |
| AKT1/2/3                                                          | Akt         | Group          |
| Calmodulin                                                        | CALM        | Group          |
| Calcium/calmodulin-dependent protein kinase II alpha              | CAMK2A      | 25400          |
| G protein-coupled receptor                                        | Gpcr        | Group          |
| p85 Pi3kinase                                                     | p85 (pik3r) | Group          |
| p85- $\alpha$ regulatory subunit of phosphatidylinositol 3-kinase | PIK3R1      | 25513          |
| <b>GPCR Signaling</b>                                             |             |                |
| Adrenergic receptor, alpha 1d                                     | ADRA1D      | 29413          |
| Adrenergic receptor, beta 3                                       | ADRB3       | 25645          |
| AKT1/2/3                                                          | Akt         | Group          |
| Calmodulin                                                        | CALM        | Group          |
| Calcium/calmodulin-dependent protein kinase II alpha              | CAMK2A      | 25400          |
| G protein-coupled receptor                                        | Gpcr        | Group          |
| 5-Hydroxytryptamine (serotonin) receptor 1A, G protein-coupled    | HTR1A       | 24473          |
| Nociceptin/orphanin FQ receptor                                   | OPRL1       | 29256          |
| p85 Pi3kinase                                                     | p85 (pik3r) | Group          |
| p85- $\alpha$ regulatory subunit of phosphatidylinositol 3-kinase | PIK3R1      | 25513          |

**Table S4. Genes/gene groups for canonical paths for Fig. 4B**

| Entrez gene name                                               | Symbol             | Entrez gene ID |
|----------------------------------------------------------------|--------------------|----------------|
| Glucocorticoid receptor signaling                              |                    |                |
| cAMP response element binding                                  | Creb               | Group          |
| G protein-coupled receptor                                     | Gpcr               | Group          |
| H3, H3.3, Histone H3B                                          | Histone h3         | Group          |
| Nuclear factor $\kappa$ b transcription factor                 | NFkB (complex)     | Group          |
| Ikb kinase alpha                                               | NFKBIA             | 25493          |
| p85 Pi3kinase                                                  | p85 (pik3r)        | Group          |
| RNA polymerase II                                              | RNA polymerase II  | Group          |
| GPCR signaling                                                 |                    |                |
| Calmodulin                                                     | CALM               | Group          |
| Cholinergic receptor, muscarinic 5                             | CHRM5              | 53949          |
| cAMP response element binding                                  | Creb               | Group          |
| G protein-coupled receptor                                     | Gpcr               | Group          |
| 5-Hydroxytryptamine (serotonin) receptor 1A, G protein-coupled | HTR1A              | 24473          |
| 5-Hydroxytryptamine (serotonin) receptor 2B, G protein-coupled | HTR2B              | 29581          |
| 5-Hydroxytryptamine (serotonin) receptor 5B                    | Htr5b              | 79247          |
| Nuclear factor $\kappa$ b transcription factor                 | NFkB (complex)     | Group          |
| Nuclear factor $\kappa$ b transcription factor                 | NFKBIA             | 25493          |
| p85 Pi3kinase                                                  | p85 (pik3r)        | Group          |
| Protein kinase, cAMP-dependent, regulatory, type II, alpha     | PRKAR2A            | 29699          |
| Serotonin receptor                                             | Serotonin receptor | Group          |
| Protein kinase A signaling                                     |                    |                |
| A kinase (PRKA) anchor protein 4                               | AKAP4              | 78254          |
| Calmodulin                                                     | CALM               | Group          |
| cAMP response element binding                                  | Creb               | Group          |
| G protein-coupled receptor                                     | Gpcr               | Group          |
| H3, H3.3, Histone H3B                                          | Histone h3         | Group          |
| Nuclear factor $\kappa$ b transcription factor                 | NFkB (complex)     | Group          |
| Nuclear factor $\kappa$ b transcription factor                 | NFKBIA             | 25493          |
| Protein kinase, cAMP-dependent, regulatory, type II, alpha     | PRKAR2A            | 29699          |
| Serotonin receptor signaling                                   |                    |                |
| G protein-coupled receptor                                     | Gpcr               | Group          |
| 5-Hydroxytryptamine (serotonin) receptor 1A, G protein-coupled | HTR1A              | 24473          |
| 5-Hydroxytryptamine (serotonin) receptor 2B, G protein-coupled | HTR2B              | 29581          |
| 5-Hydroxytryptamine (serotonin) receptor 5B                    | Htr5b              | 79247          |
| Serotonin receptor                                             | Serotonin receptor | Group          |
